# Supplementary material for: Tetracycline-exposed Drosophila melanogaster males produce fewer offspring but a relative excess of sons
Source: PubMed Central journal article supplement (PMC4559055; doi:10.1002/ece3.1535), 2015-07-14

Supplementary Figure 1: Sex ratio (male:female) of progeny produced by F1 males for a) RAL73<sup>w+</sup> and b) RAL73<sup>w-</sup>. These data are shown in boxplot format, with the median shown as a black line within the box and the edges of the box indicating the 25<sup>th</sup> and 75<sup>th</sup> percentile. Whiskers span 1.5 times the interquartile range. Untransformed data are shown.

a)

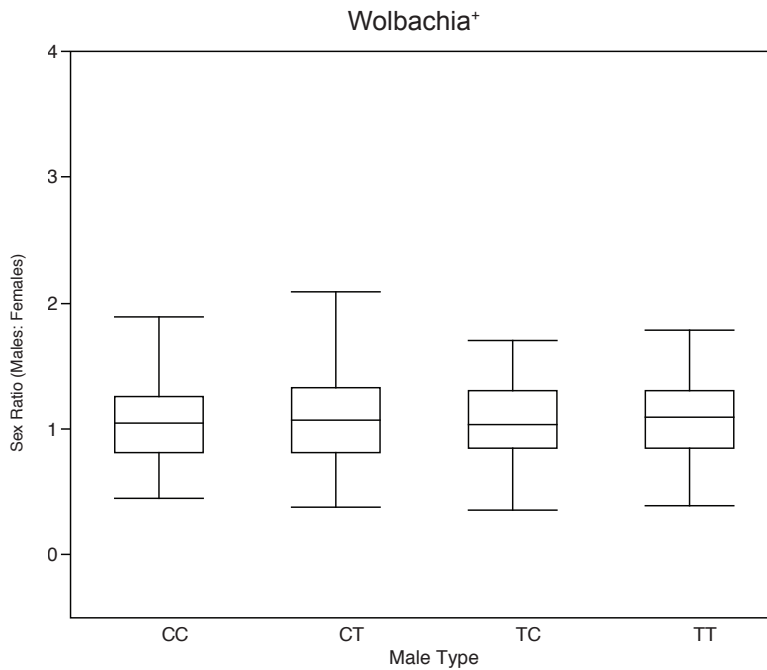

b)

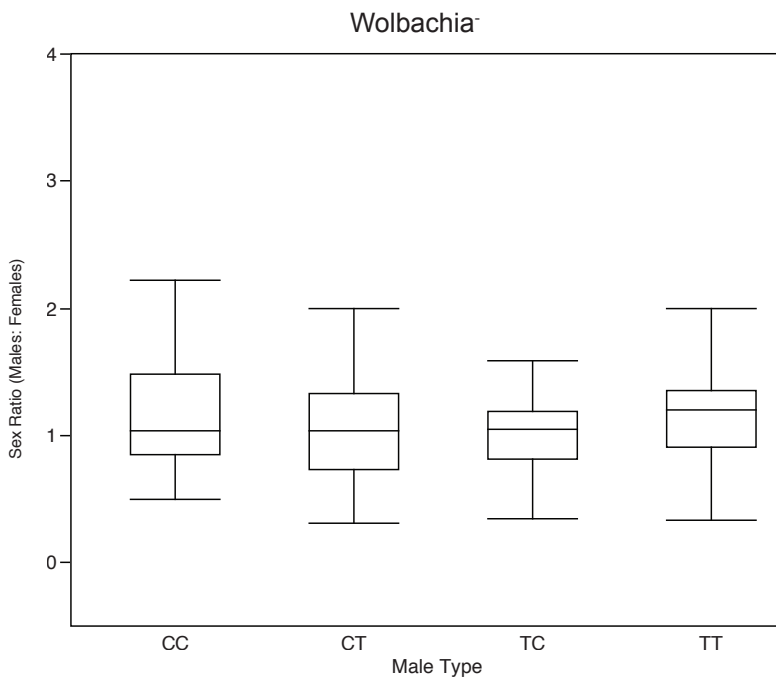

Supplementary Figure 2: Sex ratio (male:female) of progeny produced by F2 males for a) RAL73<sup>w+</sup> and b) RAL73<sup>w-</sup>. These data are shown in boxplot format, with the median shown as a black line within the box and the edges of the box indicating the 25<sup>th</sup> and 75<sup>th</sup> percentile. Whiskers span 1.5 times the interquartile range. Untransformed data are shown.

a)

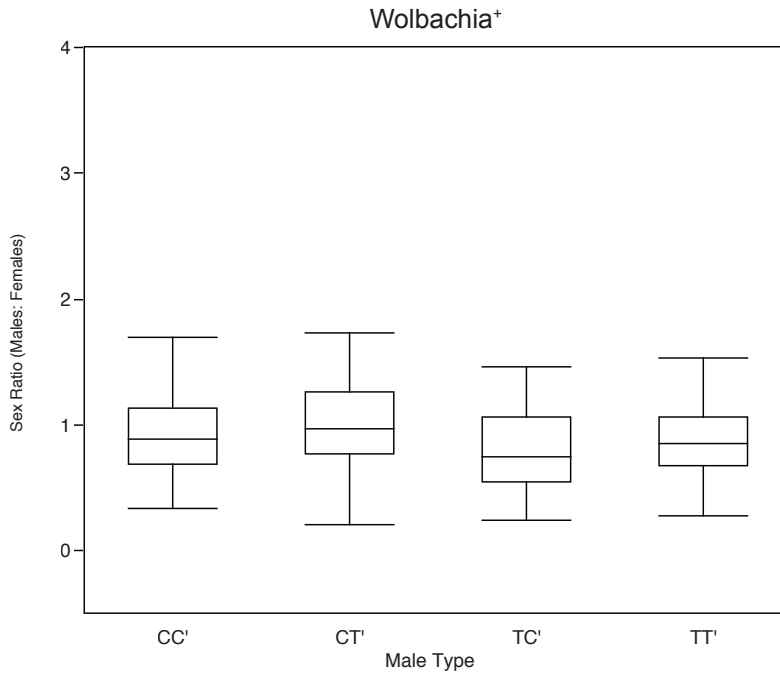

b)

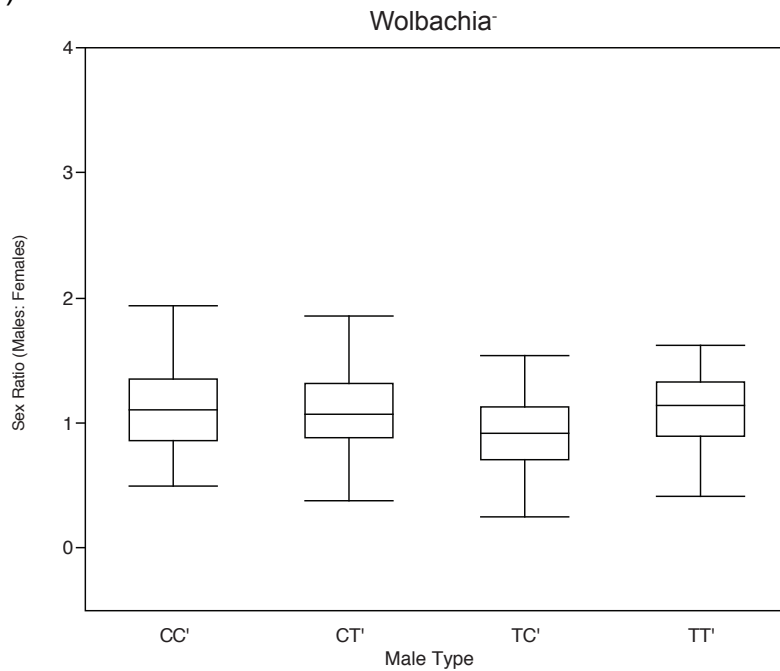

Supplementary Figure 3: Number of male and female progeny by matings of P0 control and treated flies for a)  $RAL73^{w+}$  and b)  $RAL73^{w-}$ . These data are shown in boxplot format, with the median shown as a black line within the box and the edges of the box indicating the 25<sup>th</sup> and 75<sup>th</sup> percentile. The whiskers extend to the most extreme datapoint no farther from the box than 1 times the interquartile range. Untransformed data are shown.

a)

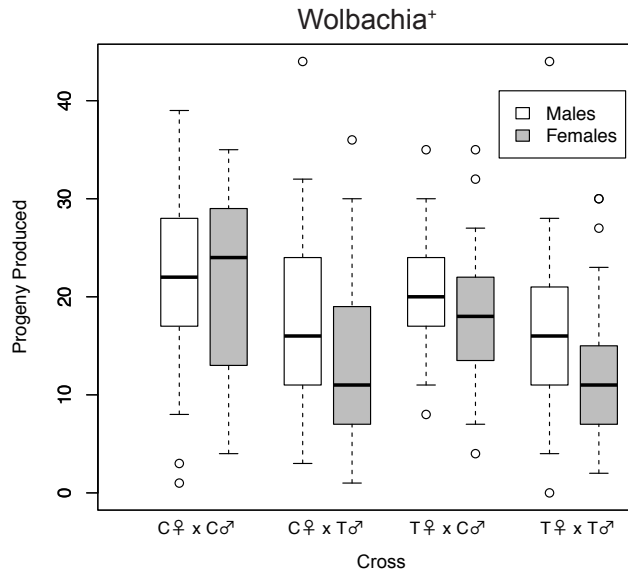

b)

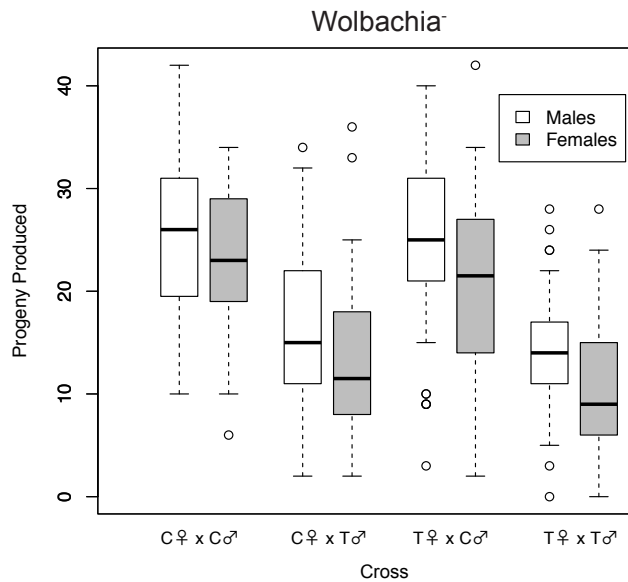

Supplementary Figure 4: Total number of progeny produced by F1 males for a) RAL73<sup>w+</sup> and b) RAL73<sup>w-</sup>. These data are shown in boxplot format, with the median shown as a black line within the box and the edges of the box indicating the 25<sup>th</sup> and 75<sup>th</sup> percentile. The whiskers span 1.5 times the interquartile range. Untransformed data are shown.

a)

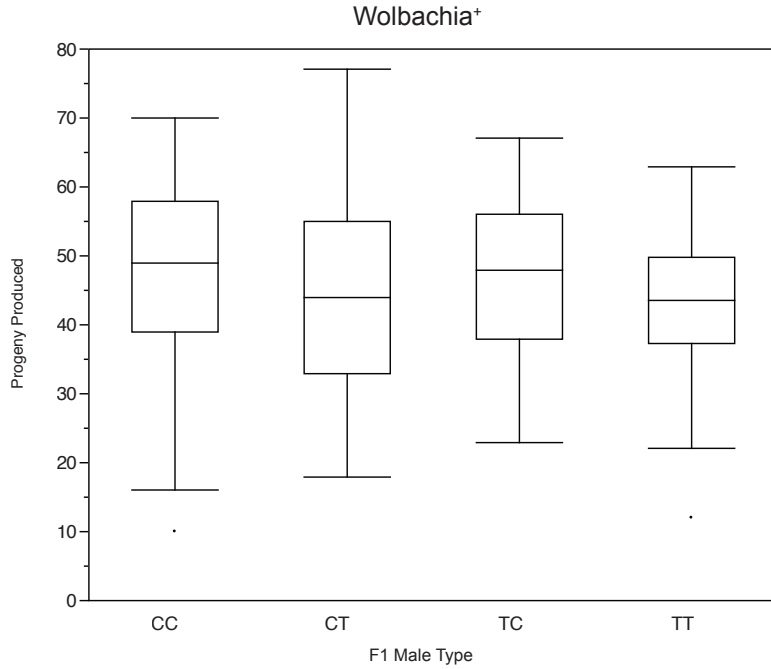

b)

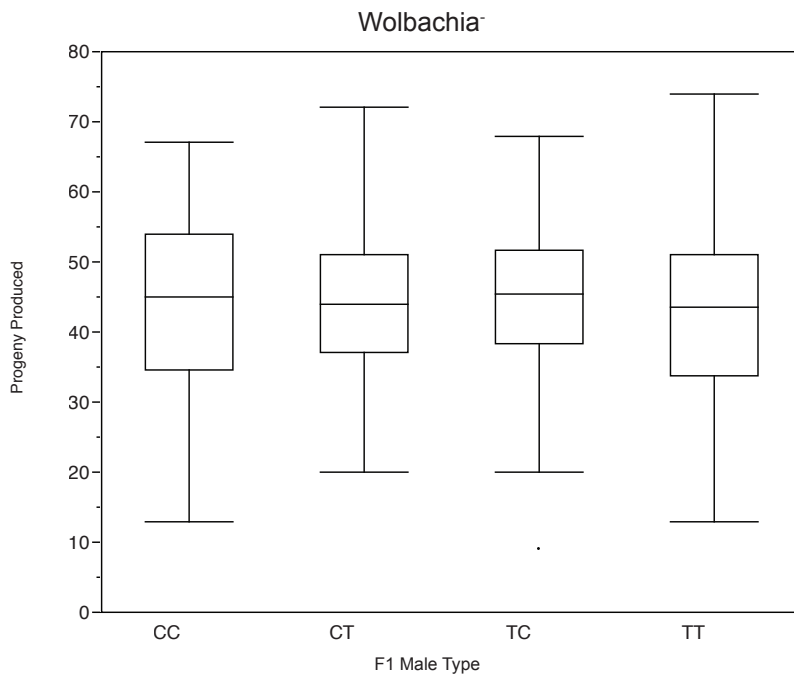

Supplementary Figure 5: Total number of progeny produced by F2 males for a) RAL73<sup>w+</sup> and b) RAL73<sup>w-</sup>. These data are shown in boxplot format, with the median shown as a black line within the box and the edges of the box indicating the 25<sup>th</sup> and 75<sup>th</sup> percentile. Whiskers span 1.5 times the interquartile range. Untransformed data are shown.

a)

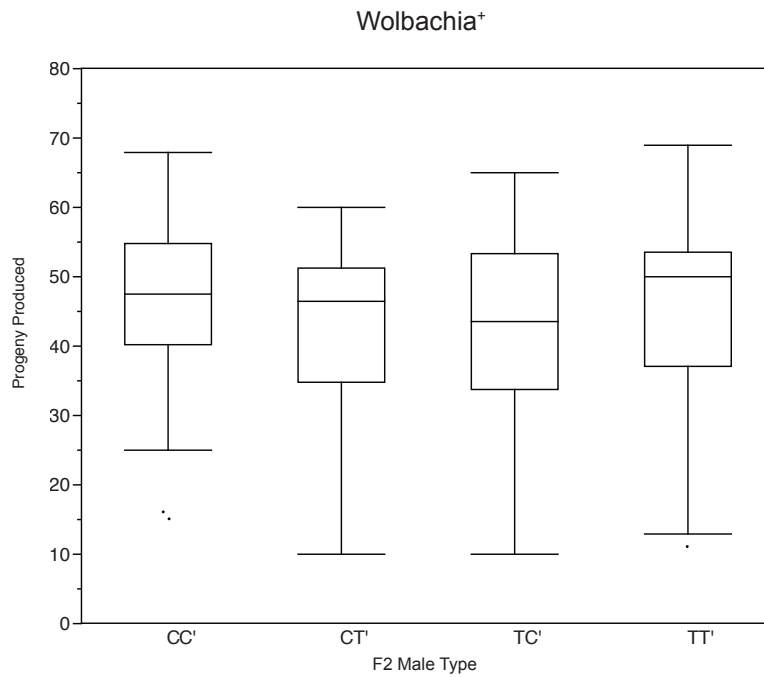

b)

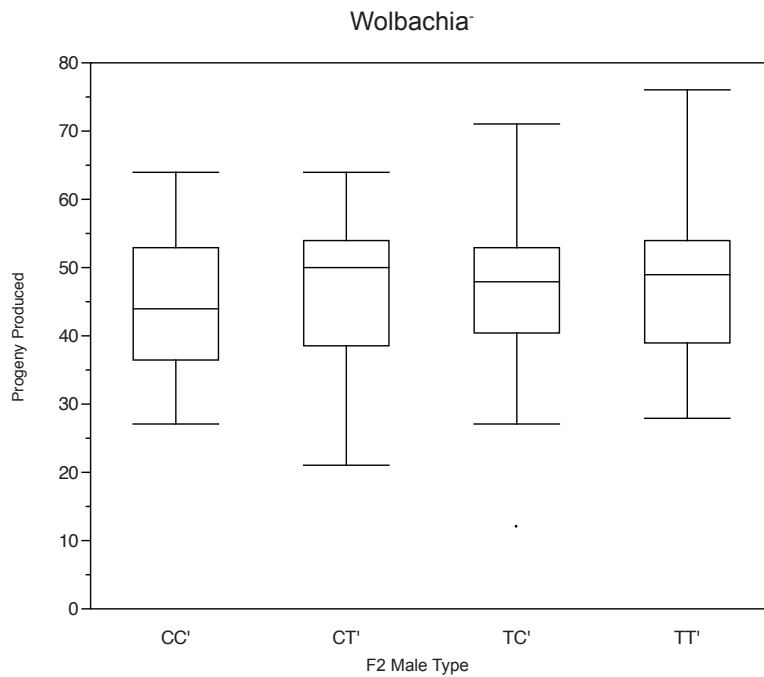

Supplement: ece30005-3130-sd1.pdf [file ece30005-3130-sd1.pdf]
